# Supplementary material
Source: PubMed Central journal article supplement (PMC3958140)
Supplement: ac403750z_si_001.pdf [file ac403750z_si_001.pdf]

**Page S-1**

**Title**

A Nucleic Acid Test to Diagnose Cryptosporidiosis: Lab Assessment in Animal and Patient  
Specimens

**Authors and Affiliations**

Zachary Austin Crannell<sup>1</sup>, Alejandro Castellanos-Gonzalez<sup>2</sup>, Ayesha Irani<sup>2</sup>, Brittany Rohrman<sup>1</sup>,  
Arthur Clinton White<sup>2</sup>, Rebecca Richards-Kortum<sup>1\*</sup>

<sup>1</sup> Rice University

6500 Main Street

Houston, TX

<sup>2</sup> University of Texas Medical Branch

301 University Boulevard

Galveston, TX

\*To whom correspondence should be addressed: [rkortum@rice.edu](mailto:rkortum@rice.edu)

**Abstract**

Supplemental information relating to the intra-sample consistency of the RPAC assay.

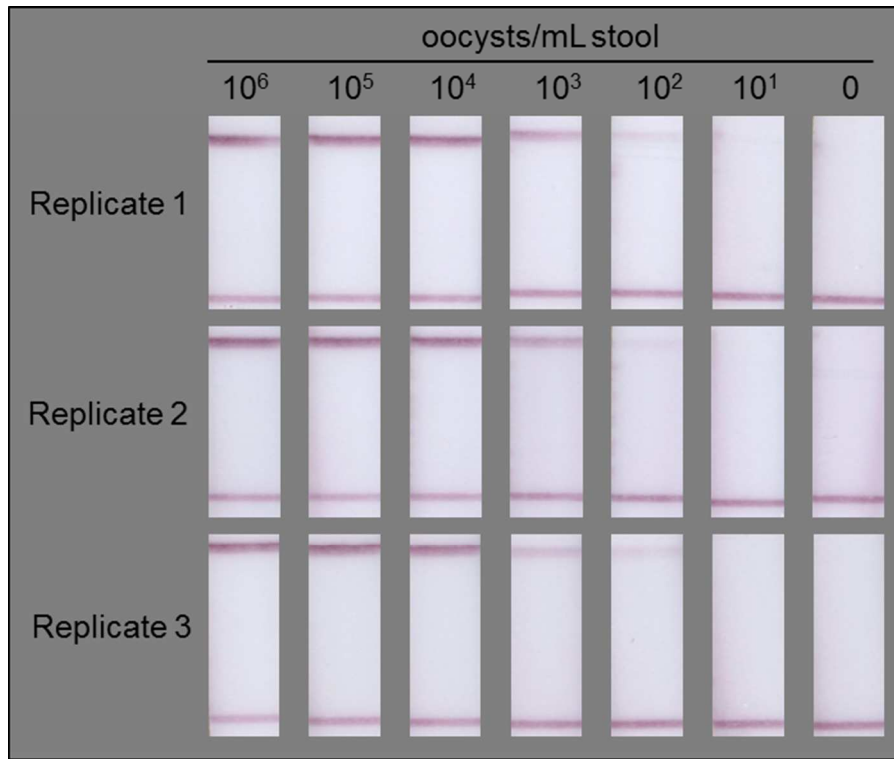

**Figure S1. Intra-assay reliability testing.** DNA extracts from stool containing various concentrations of oocysts were testing in triplicate to assess intra-assay reliability. For every concentration tested, all three RPAC assay repeats yielded the same result, consistently detecting as few as  $10^2$  oocysts/mL stool.
